# Supplementary material
Source: ML conference proceedings conference paper supplement (https://openreview.net/forum?id=PiKMmLHbEH)

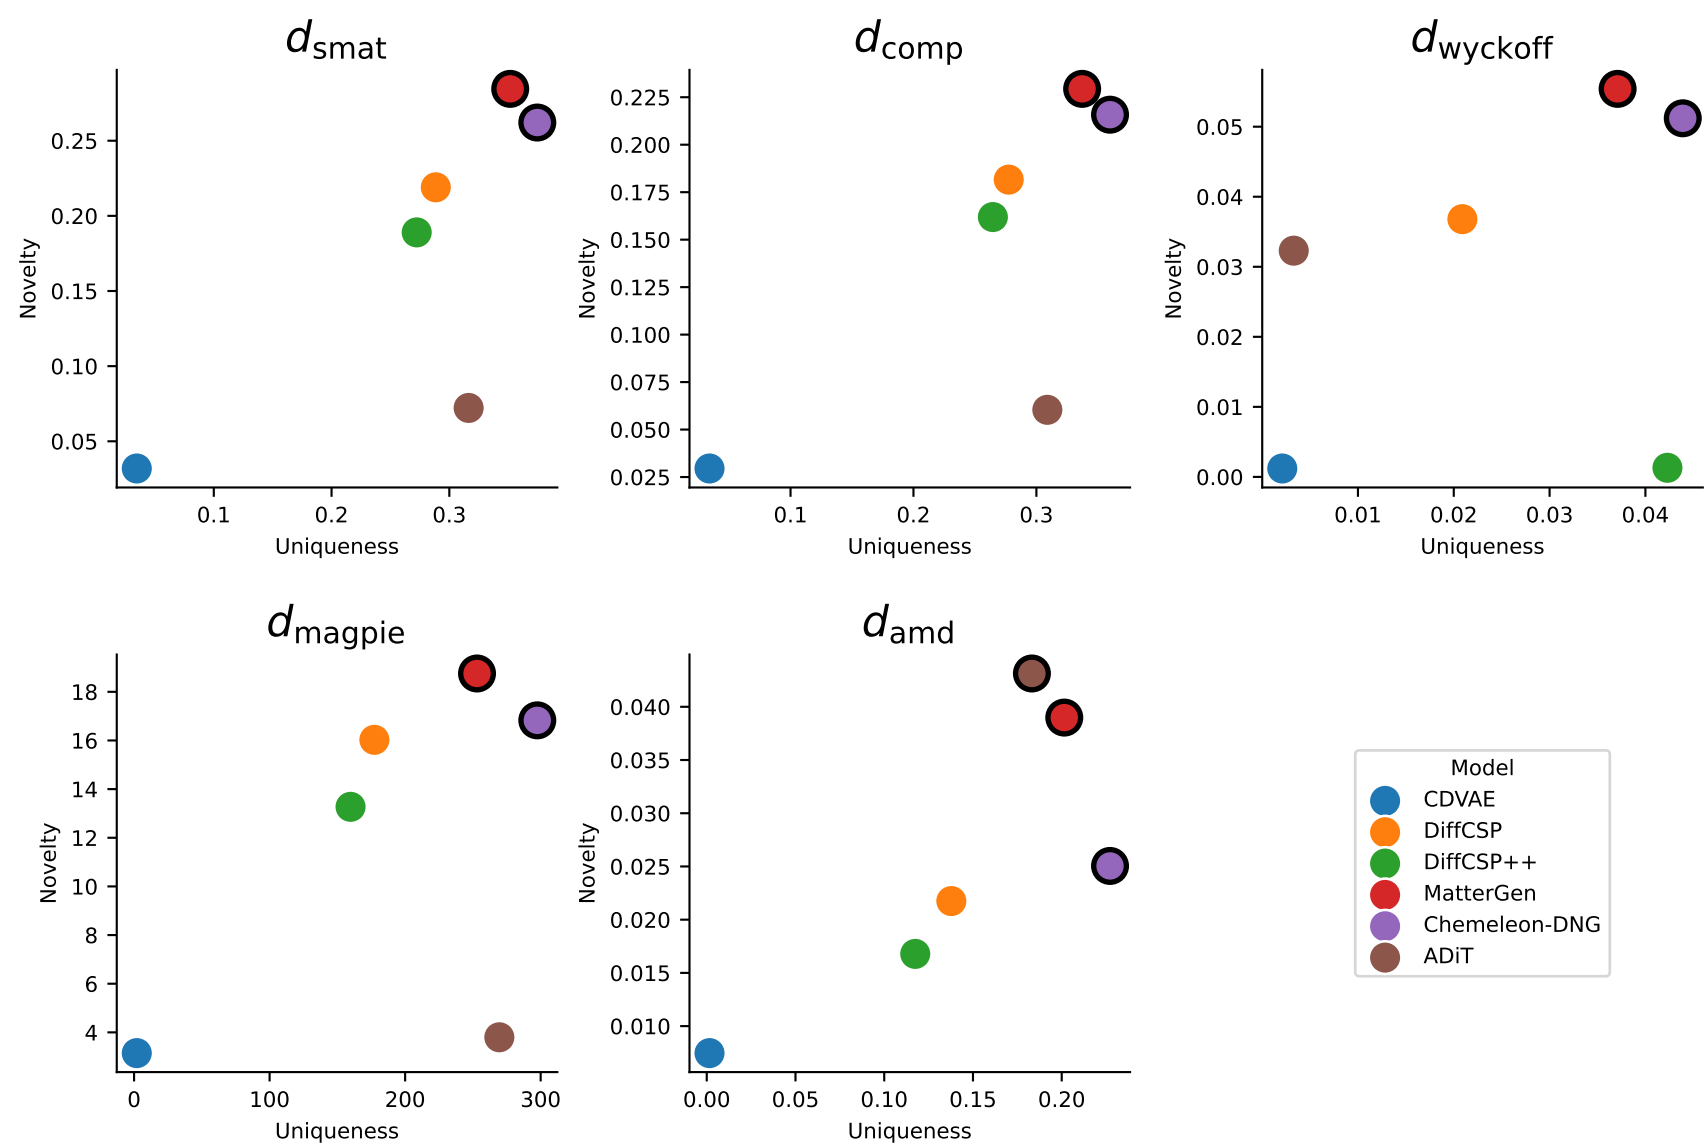

Supplement: supplementary_material [file pareto_plot_neurips2025.pdf › xgemval/expt/vis/pareto_plot_neurips2025.pdf]
